# Supplementary material for: Optical Microscopy-Guided Laser Ablation Electrospray Ionization Ion Mobility Mass Spectrometry: Ambient Single Cell Metabolomics with Increased Confidence in Molecular Identification
Source: PubMed Central journal article supplement (PMC8065410; doi:10.3390/metabo11040200), 2021-03-27
Supplement: metabolites-11-00200-s001.pdf [file metabolites-11-00200-s001.pdf]

*Supplementary information for:*

**Optical microscopy-guided laser ablation electrospray ionization ion mobility mass spectrometry: ambient single cell metabolomics with increased confidence in molecular identification**

**Michael J. Taylor<sup>1</sup>, Sara Mattson<sup>2</sup>, Andrey Liyu<sup>1</sup>, Sylwia A. Stopka<sup>2,3</sup>, Yehia Ibrahim<sup>1</sup>, Akos Vertes<sup>2</sup>, and Christopher R. Anderton\*<sup>1</sup>**

<sup>1</sup>Earth and Biological Sciences Directorate, Pacific Northwest National Laboratory, Richland, WA, USA 99352

<sup>2</sup>Department of Chemistry, W. M. Keck Institute for Proteomics Technology and Applications, The George Washington University, Washington, DC 20052

<sup>3</sup>Department of Neurosurgery, Brigham and Women's Hospital, Harvard Medical School, Boston, MA 02115

\*Christopher.Anderton@pnl.gov; 902 Battelle Boulevard, Richland, Washington 99352; 509-371-7970

*Table of Figures*

|                                                                                                                                  |   |
|----------------------------------------------------------------------------------------------------------------------------------|---|
| <i>Figure S1:</i> Determining the sensitivity of the LAESI-DTIMS microscope with verapamil .....                                 | 2 |
| <i>Figure S2:</i> Technical noise from ablation of droplets of standards .....                                                   | 2 |
| <i>Figure S3:</i> Images of laser spots on <i>ZAP-IT</i> paper in beam focusing experiments over a range of Z stage heights..... | 4 |
| <i>Figure S4:</i> The effect of sample stage height on spot uniformity and spot size .....                                       | 3 |
| <i>Figure S5:</i> Large area stitched image mosaic of a <i>A. Cepa</i> tissue section.....                                       | 3 |
| <i>Table S1:</i> Raw counts from saccharides detected in 60 cell dataset.....                                                    | 4 |

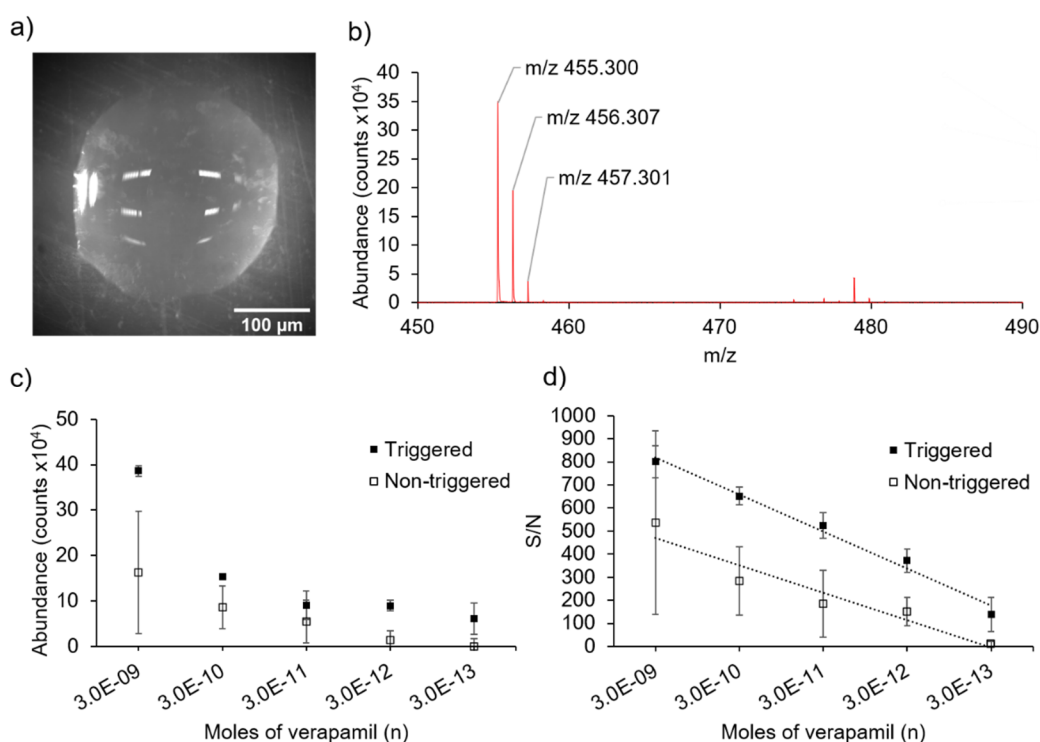

**Figure S1.** Determining the sensitivity of the LAESI-DTIMS microscope for detection of verapamil. a) Brightfield image of a verapamil solution droplet on the sample surface taken from the optical microscope component of the system, b) example positive ion mode verapamil spectrum, with its distinct peaks at  $m/z$  455.300  $[M+H]^+$  its isotopic envelope at  $m/z$  456.307, and  $m/z$  457.301. c) Comparison of MS triggered (■) and MS non-triggered (□) laser firing on sensitivity and ion abundance variability of verapamil standards at different concentrations ( $1.0 \times 10^{-3}$  to  $1.0 \times 10^{-7}$  mol/l), error bars are shown as standard deviation,  $n=10$ . d) Linear regression showing the limit of detection for MS triggered (calculated to be 32 fmol) and MS non-triggered (calculated to be 7,460 fmol) sampling for verapamil standards. These results show that MS-triggered mode is more sensitive than non-triggered mode.

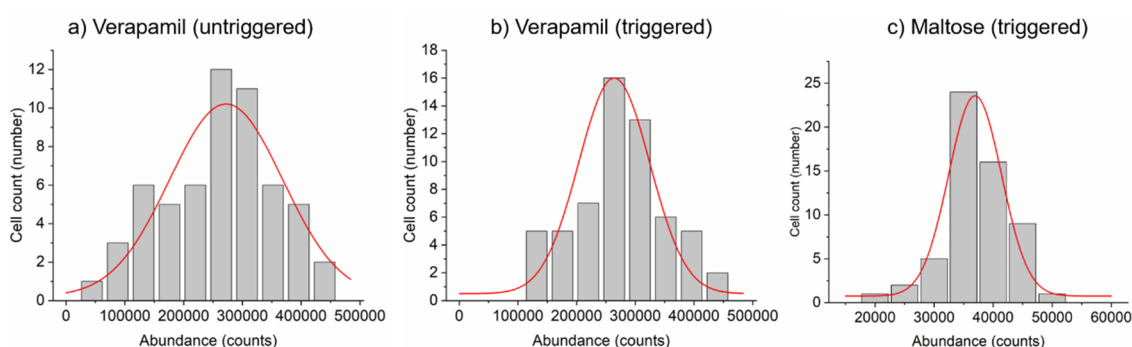

**Figure S2.** Technical noise from ablation of droplets of standards ( $3 \mu\text{l}$  of  $1.0 \times 10^{-3}$  mol/l) using non-triggered (verapamil) and triggered (verapamil, maltose) with the LAESI-IMS-MS molecular microscope. Gaussian fitting was performed in Origin,  $n = 10$ . These results show that timing the laser firing with the ion accumulation window of the DTIMS system minimizes detection variance.

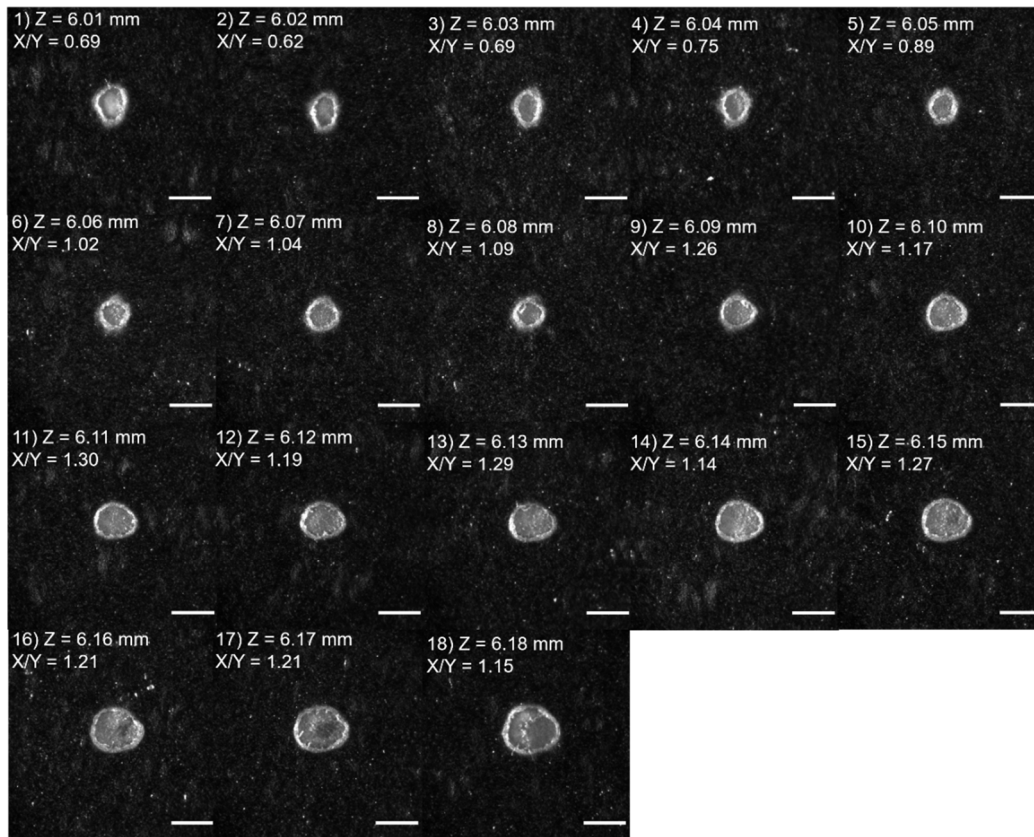

**Figure S3.** (1-18) Images of laser spots on ZAP-IT paper in beam focusing experiments over a range of Z stage heights defined as distance from the capillary inlet to the sample surface (mm). A single laser shot per measurement was fired for each image with a laser power of  $\sim 1.065$  mJ. Scale bars shown are  $100 \mu\text{m}$ . These results show that increasing the distance from the sample surface to the MS inlet and laser objective defocuses the laser, the optimal focus is tile 6), Z distance of 6.06 mm, spot diameter of  $52.06 \mu\text{m}$ .

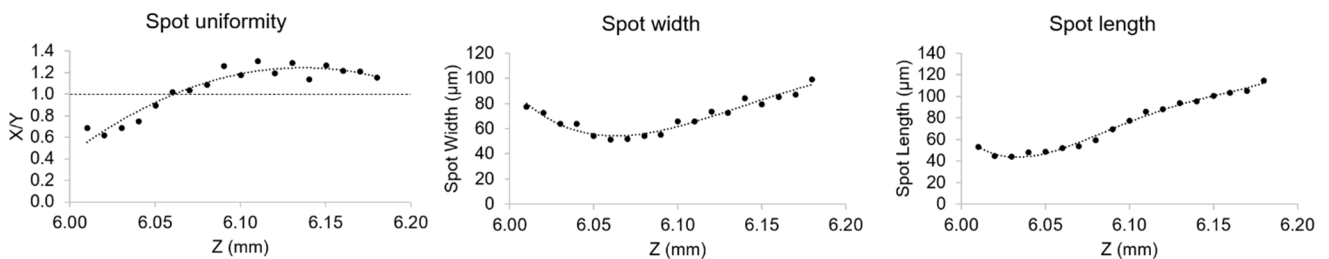

**Figure S4.** The effect of sample stage height on spot size and uniformity demonstrated with ZAP-IT paper based upon data shown in Figure S4. Laser spot uniformity (left graph). Y axis displays ratio of spot size width/length ( $\mu\text{m}$ ), X axis displays Z stage height ( $\mu\text{m}$ ) given as distance from sample surface to MS capillary inlet. Intercept of line of best fit with dashed line equals best laser focus, i.e. (width/length = 1). Laser spot size (middle, right graph) over a range of Z heights, Y axis displays spot length or width ( $\mu\text{m}$ ), X axis displays Z stage height ( $\mu\text{m}$ ) given as distance from sample surface to MS capillary inlet. These results show the optimal spot size for cell analysis is a Z height of 6.06 mm.

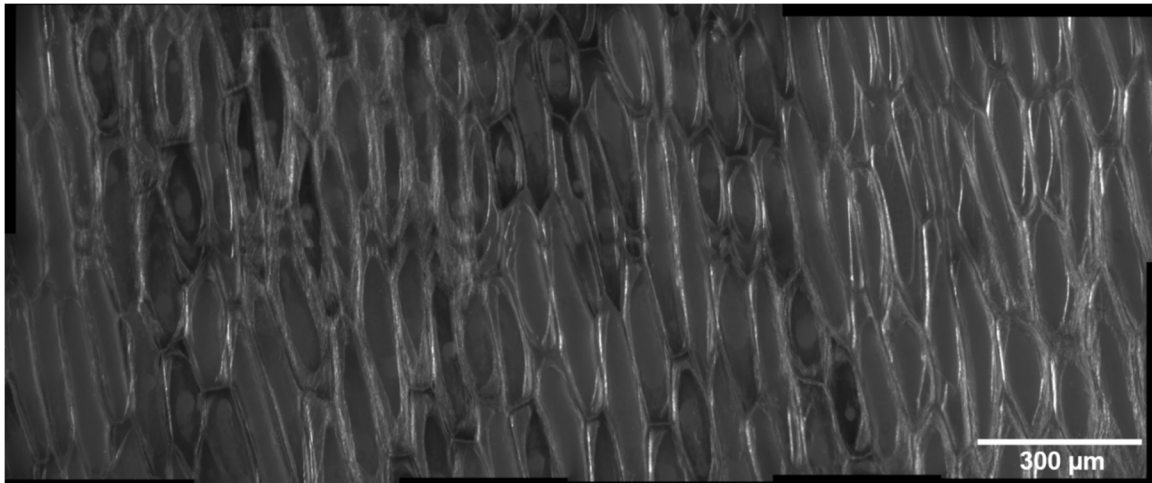

**Figure S5.** Large area stitched image mosaic of a *A. Cepa* tissue section. The 12 separate image tiles are recombined into a  $6 \times 2$  (X/Y) mosaic based on feature recognition. This image shows that image tiles can be recombined into a large area mosaic using our workflow.

**Table S1.** Raw counts of different saccharide species detected in 60 *A. Cepa* cells. number of repeat units (r).

| Cell number<br>(no.) | Saccharide raw counts in 60 cell dataset |                         |                          |                            |
|----------------------|------------------------------------------|-------------------------|--------------------------|----------------------------|
|                      | Monosaccharide<br>(r = 1)                | Disaccharide<br>(r = 2) | Trisaccharide<br>(r = 3) | Tetrasaccharide<br>(r = 4) |
| 1                    | 96128                                    | 64607                   | 14850                    | 8152                       |
| 2                    | 79206                                    | 61679                   | 21363                    | 4621                       |
| 3                    | 39387                                    | 45590                   | 22939                    | 6090                       |
| 4                    | 29348                                    | 63223                   | 17114                    | 7475                       |
| 5                    | 96085                                    | 64612                   | 12773                    | 7502                       |
| 6                    | 95285                                    | 54607                   | 12955                    | 2235                       |
| 7                    | 61024                                    | 61672                   | 23483                    | 2394                       |
| 8                    | 26708                                    | 28480                   | 18145                    | 5564                       |
| 9                    | 73118                                    | 73223                   | 10153                    | 7069                       |
| 10                   | 80001                                    | 72185                   | 19805                    | 6767                       |
| 11                   | 54384                                    | 31870                   | 23450                    | 4316                       |
| 12                   | 61319                                    | 45994                   | 19013                    | 4759                       |
| 13                   | 1702                                     | 40994                   | 15846                    | 4304                       |
| 14                   | 1551                                     | 41994                   | 16332                    | 2653                       |
| 15                   | 3039                                     | 45862                   | 21431                    | 3324                       |
| 16                   | 4042                                     | 46481                   | 20096                    | 3193                       |
| 17                   | 1698                                     | 61675                   | 21260                    | 4975                       |
| 18                   | 80024                                    | 62185                   | 19124                    | 7975                       |
| 19                   | 2733                                     | 45906                   | 17956                    | 3664                       |
| 20                   | 2265                                     | 45024                   | 21257                    | 8441                       |
| 21                   | 8137                                     | 40989                   | 18207                    | 892                        |
| 22                   | 8459                                     | 45820                   | 16195                    | 5849                       |
| 23                   | 1731                                     | 45991                   | 15028                    | 5907                       |
| 24                   | 45174                                    | 46472                   | 12787                    | 4202                       |
| 25                   | 87277                                    | 45691                   | 14544                    | 1807                       |
| 26                   | 29401                                    | 41024                   | 18100                    | 5840                       |
| 27                   | 95181                                    | 32607                   | 13542                    | 4042                       |
| 28                   | 87273                                    | 41029                   | 14525                    | 8371                       |
| 29                   | 73102                                    | 73024                   | 12872                    | 4048                       |
| 30                   | 79911                                    | 62182                   | 16561                    | 3734                       |
| 31                   | 87342                                    | 31865                   | 1049                     | 3893                       |
| 32                   | 61327                                    | 45981                   | 19843                    | 5978                       |
| 33                   | 12773                                    | 62214                   | 11062                    | 6077                       |
| 34                   | 12767                                    | 38214                   | 18348                    | 4249                       |
| 35                   | 21996                                    | 20386                   | 21000                    | 5396                       |
| 36                   | 13603                                    | 34149                   | 21648                    | 6352                       |
| 37                   | 21862                                    | 65634                   | 15197                    | 8138                       |
| 38                   | 18389                                    | 32214                   | 19942                    | 7604                       |
| 39                   | 2201                                     | 55634                   | 18830                    | 7138                       |
| 40                   | 62024                                    | 19670                   | 14759                    | 3064                       |
| 41                   | 18421                                    | 14430                   | 15693                    | 5594                       |
| 42                   | 82963                                    | 39974                   | 16591                    | 5820                       |
| 43                   | 68707                                    | 31990                   | 16464                    | 3504                       |
| 44                   | 74901                                    | 55929                   | 19545                    | 1884                       |
| 45                   | 50535                                    | 30008                   | 17665                    | 5972                       |
| 46                   | 57612                                    | 42727                   | 15288                    | 7111                       |
| 47                   | 12678                                    | 31406                   | 14590                    | 7684                       |
| 48                   | 1200                                     | 49714                   | 20848                    | 5362                       |
| 49                   | 12062                                    | 44430                   | 13763                    | 9181                       |

|    |       |       |       |      |
|----|-------|-------|-------|------|
| 50 | 13064 | 50902 | 16982 | 6481 |
| 51 | 19935 | 62597 | 17636 | 1512 |
| 52 | 17703 | 41792 | 16438 | 5065 |
| 53 | 95125 | 64617 | 16084 | 5747 |
| 54 | 9623  | 54526 | 12834 | 3703 |
| 55 | 11024 | 41406 | 21361 | 7073 |
| 56 | 3137  | 45585 | 1407` | 8348 |
| 57 | 1558  | 70990 | 19756 | 2636 |
| 58 | 20914 | 49670 | 19794 | 4616 |
| 59 | 74821 | 45929 | 16387 | 1380 |
| 60 | 3131  | 50920 | 14081 | 3736 |
